# Supplementary material for: Biocatalytic synthesis and ordered self-assembly of silica nanoparticles via a silica-binding peptide
Source: publisher site journal article supplement (doi:10.3762/bjnano.14.25), 2023-02-28
Supplement: Additional file 1 [file 2190-4286-14-25-S1.pdf]

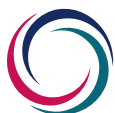

## Supporting Information

for

### **Biocatalytic synthesis and ordered self-assembly of silica nanoparticles via a silica-binding peptide**

Mustafa Gungormus

*Beilstein J. Nanotechnol.* **2023**, *14*, 280–290. [doi:10.3762/bjnano.14.25](https://doi.org/10.3762/bjnano.14.25)

## Additional experimental data

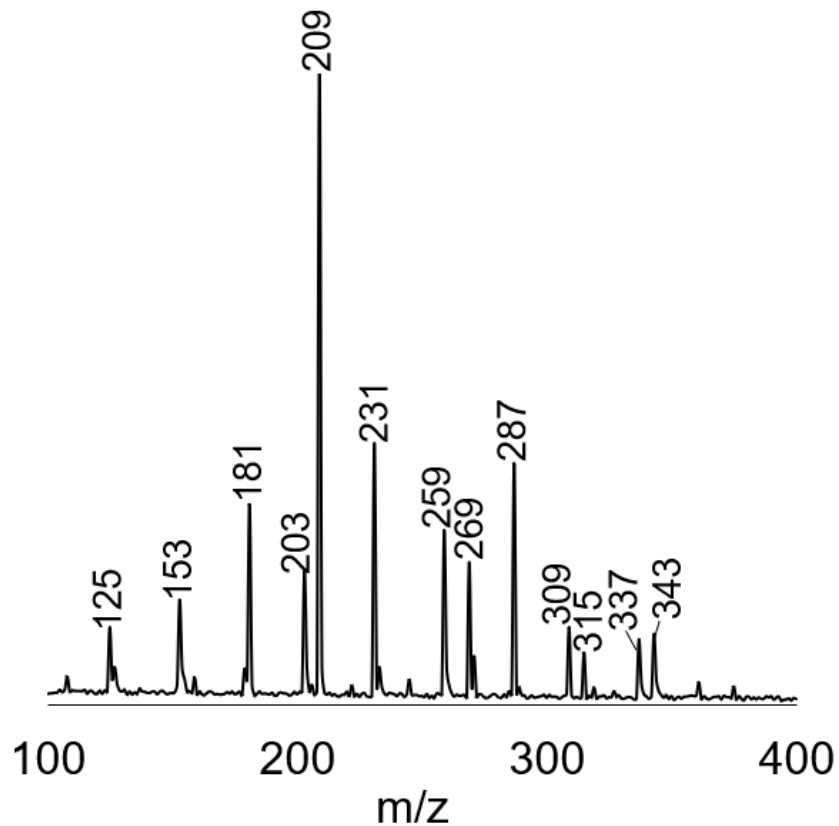

**Figure S1:** Mass spectra of the reaction solution of  $\text{NH}_3$  only after 60 min.

| $m/z$ | Species                                                           |
|-------|-------------------------------------------------------------------|
| 125   | $[\text{Si}(\text{OEt})_3(\text{OH})_1]^+$                        |
| 153   | $[\text{Si}(\text{OEt})_2(\text{OH})_2]^+$                        |
| 181   | $[\text{Si}(\text{OC}_2\text{H}_5)_1(\text{OH})_3]^+$             |
| 203   | $[\text{Si}_2\text{O}(\text{OEt})_1(\text{OH})_5]^+$              |
| 209   | $[\text{Si}(\text{OEt})_4]^+$                                     |
| 231   | $[\text{Si}_2\text{O}(\text{OEt})_2(\text{OH})_4]^+$              |
| 259   | $[\text{Si}_2\text{O}(\text{OEt})_3(\text{OH})_3]^+$              |
| 287   | $[\text{Si}_2\text{O}(\text{OEt})_4(\text{OH})_2]^+$              |
| 309   | $[\text{Si}_3\text{O}_2(\text{OC}_2\text{H}_5)_2(\text{OH})_6]^+$ |
| 315   | $[\text{Si}_2\text{O}(\text{OC}_2\text{H}_5)_5(\text{OH})_1]^+$   |
| 337   | $[\text{Si}_3\text{O}_2(\text{OC}_2\text{H}_5)_3(\text{OH})_5]^+$ |
| 343   | $[\text{Si}_2\text{O}(\text{OEt})_6]^+$                           |

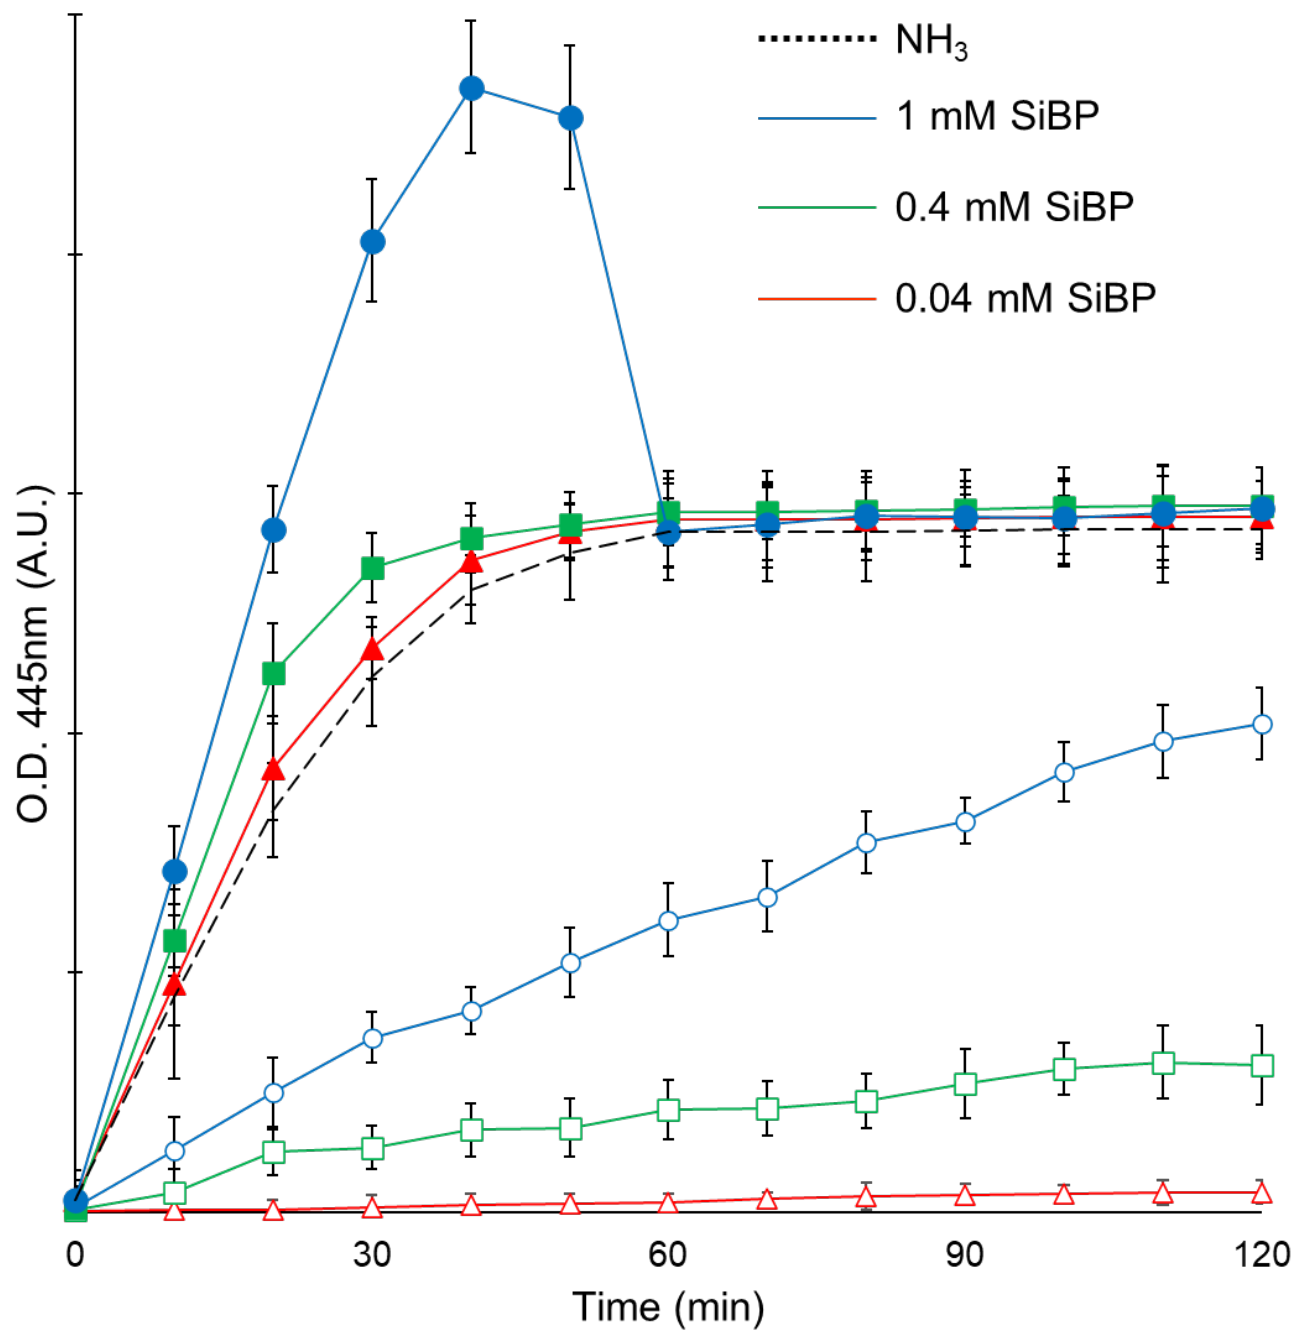

**Figure S2:** Mean OD value collected from three separate syntheses. (dashed line: no SiBP, empty markers: SiBP alone, solid markers: SiBP + 0.45 M NH<sub>3</sub>).

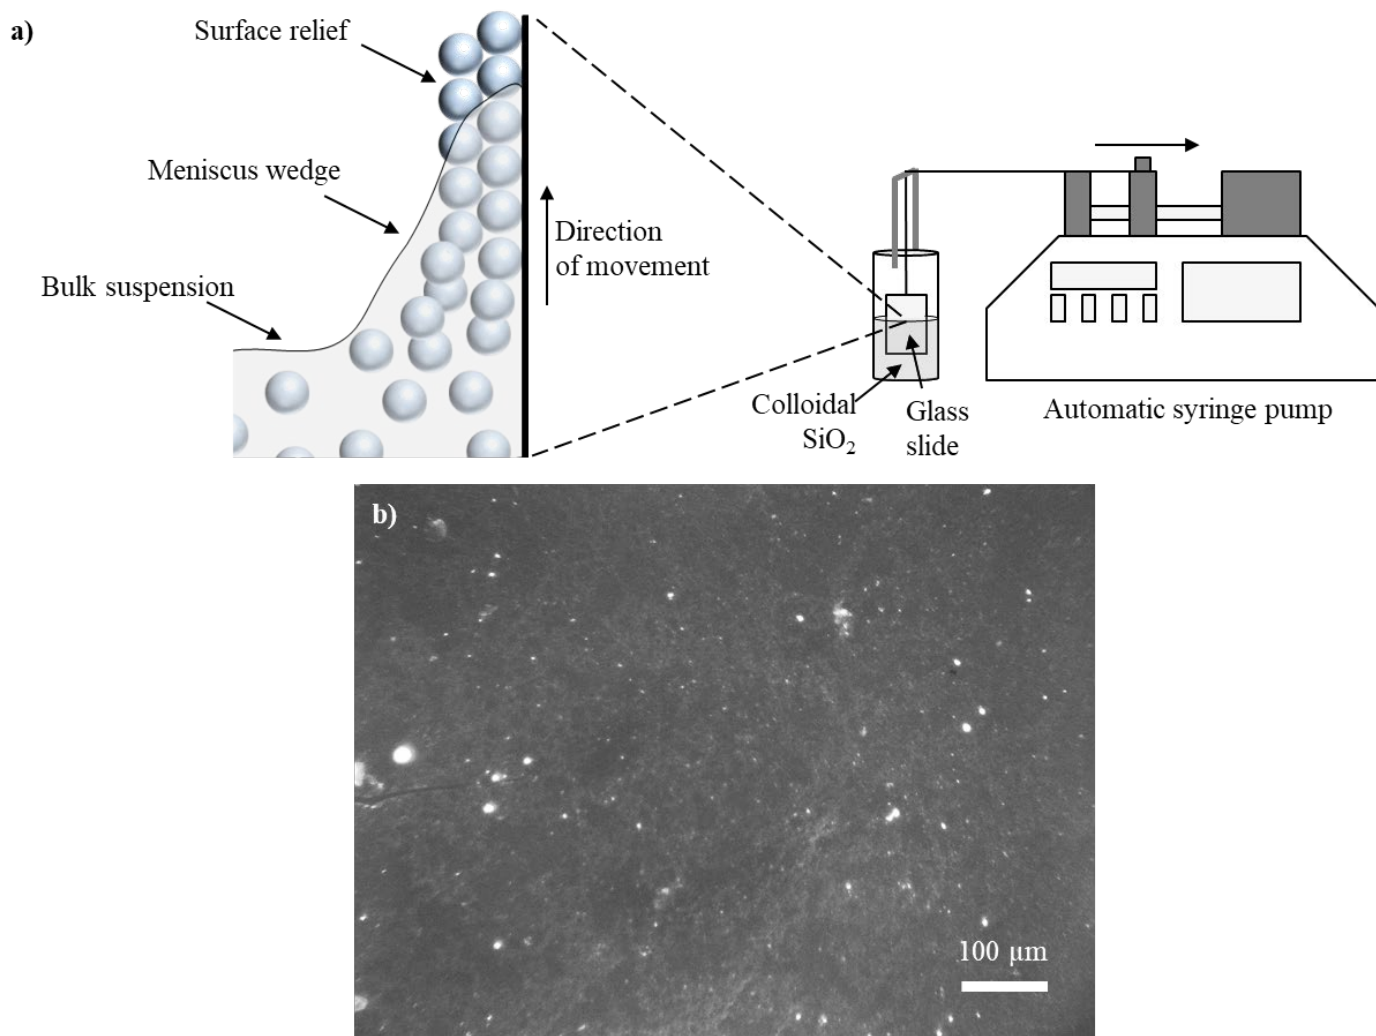

**Figure S3:** (a) Schematic representation of the vertical deposition method used in the study. (b) Gross assembly of SiO<sub>2</sub> particles on the surface.

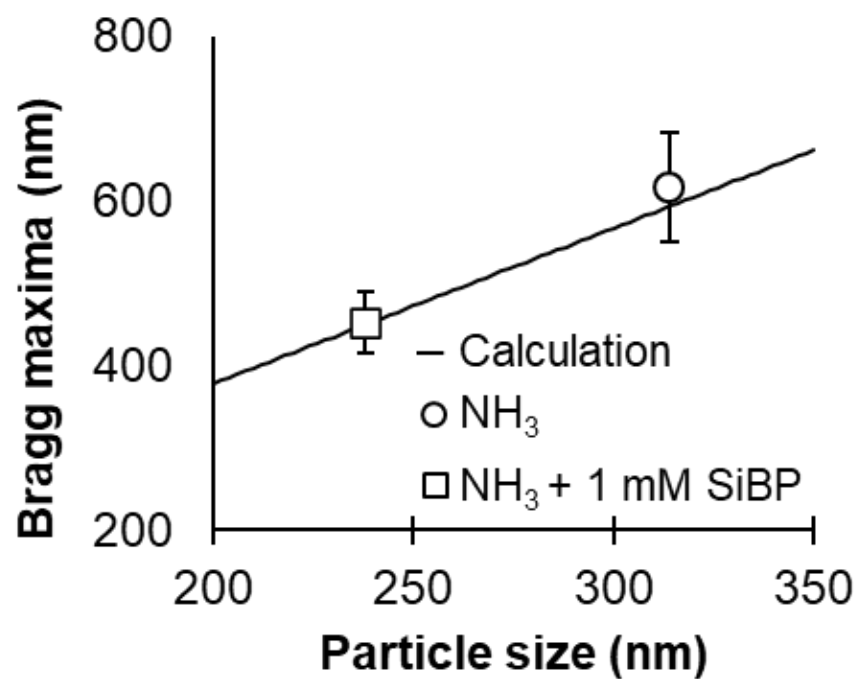

**Figure S4:** Fit of the measured  $\lambda$  values to the theoretical Bragg reflection maxima.

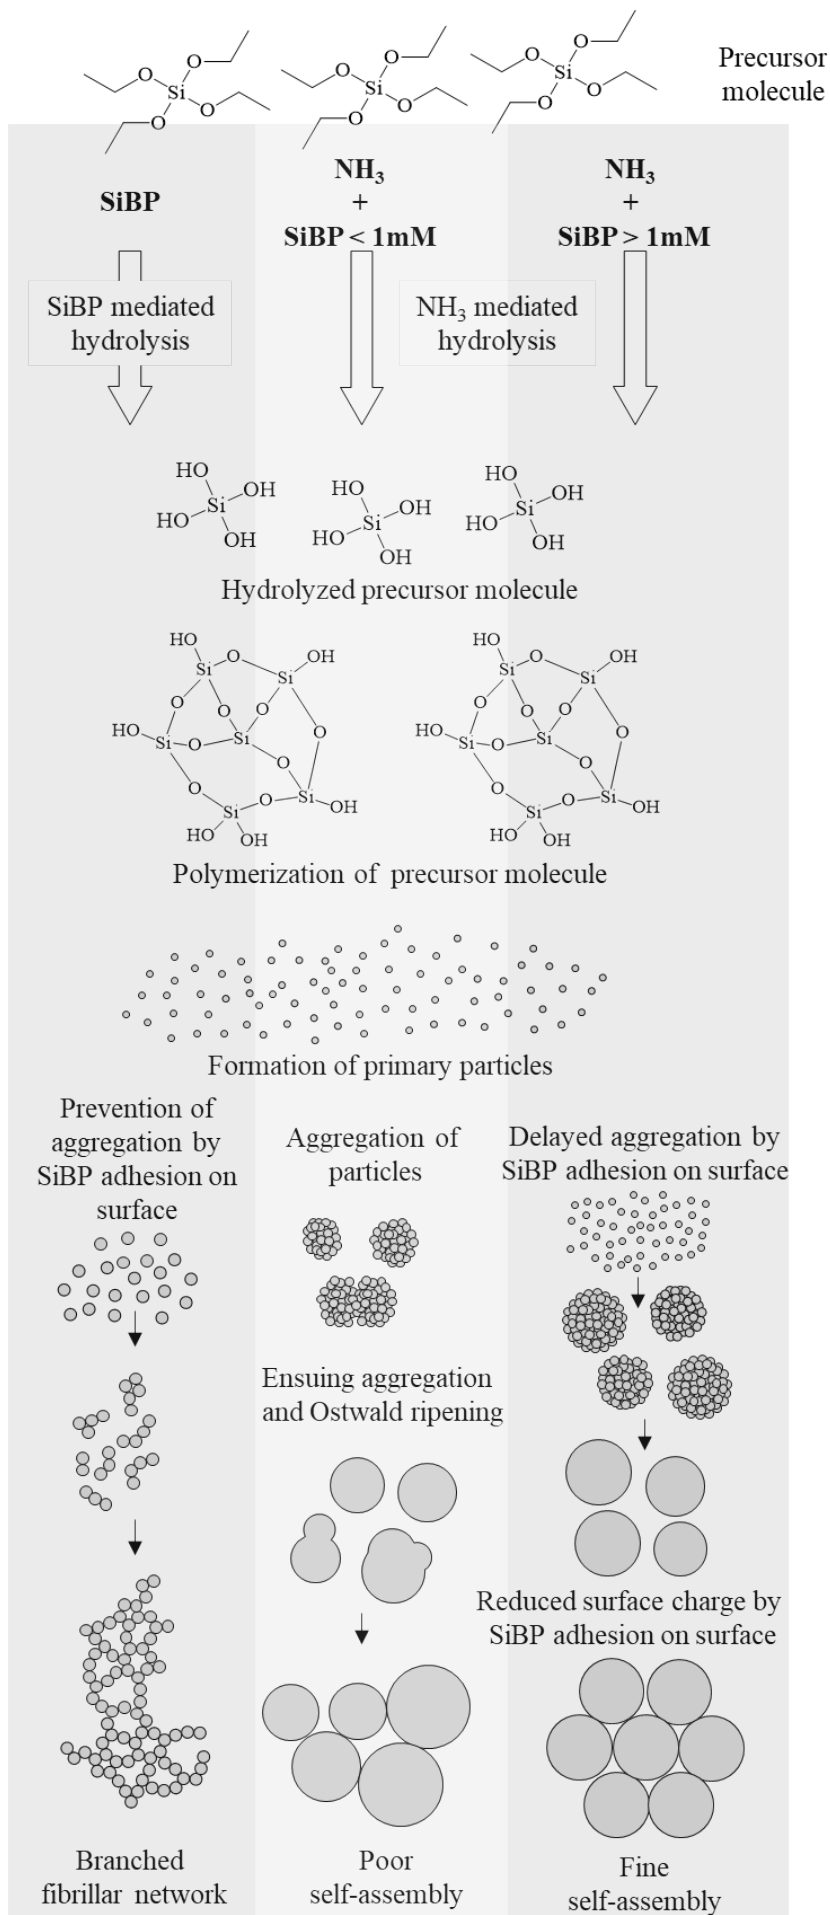

**Figure S5:** Schematic representation of the multiple roles of the SiBP in the formation and assembly of SiO<sub>2</sub>.
